# Supplementary material
Source: PubMed Central journal article supplement (PMC3909080)
Supplement: psb-8-e24097-s01.pdf [file psb-8-e24097-s01.pdf]

## **Supplemental Material to:**

**Roel Rabara, Jun Lin, Paul Rushton and Prateek Tripathi**

**GmWRKY53, a water- and salt-inducible soybean gene for rapid dissection of regulatory elements in BY-2 cell culture**

**Plant Signaling & Behavior 2013; 8(5)**

**<http://dx.doi.org/10.4161/psb.24097>**

**[www.landesbioscience.com/journals/psb/article/24097](http://www.landesbioscience.com/journals/psb/article/24097)**

**Table 1.**

| Gene                               | Roots  |        |       |       |       | Leaves |        |       |       |        |
|------------------------------------|--------|--------|-------|-------|-------|--------|--------|-------|-------|--------|
|                                    | 20 min | 40 min | 1 hr  | 2 hrs | 4 hrs | 20 min | 40 min | 1 hr  | 2 hrs | 4 hrs  |
| <i>NtRS</i> (1139734)              | 1.44   | 1.29   | 3.06  | 14.68 | 16.32 | 1.37   | 1.51   | 2.2.6 | 32.79 | 370.25 |
|                                    | 30 min | 1 hr   | 2 hrs | 3 hrs | 5 hrs | 30 min | 1 hr   | 2 hrs | 3 hrs | 5 hrs  |
| <i>GmWRKY53</i><br>(Glyma19g26400) | 3.42   | 4.55   | 8.76  | 9.07  | 11.09 | 1.34   | 1.57   | 4.74  | 20.34 | 25.30  |
